# Supplementary material
Source: Springer Nature journal article supplement (https://www.springermedizin.de/resource/supplementary/12936_2006_257_MOESM2_ESM.pdf/9547320)

Antananarivo ←

→ Toamisa

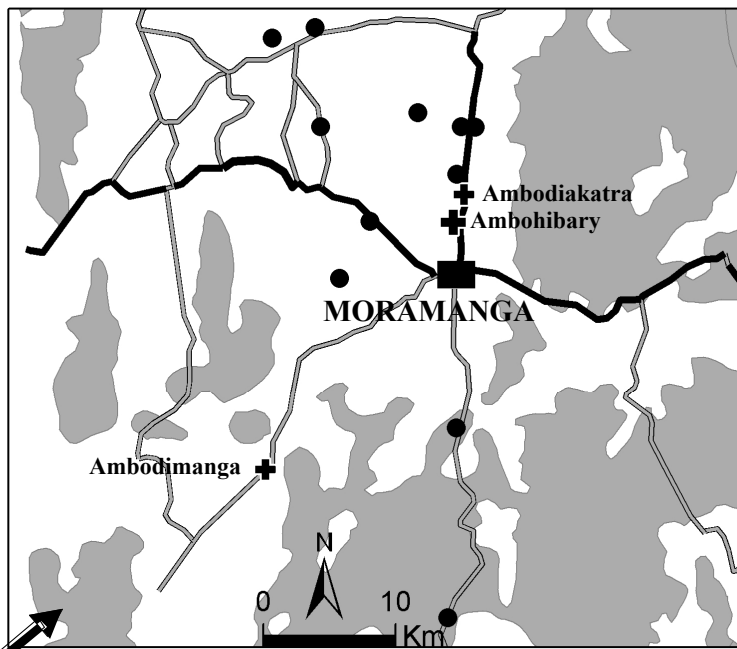

- National road
- Trails
- Forests
- Rivers

0 200  
Km

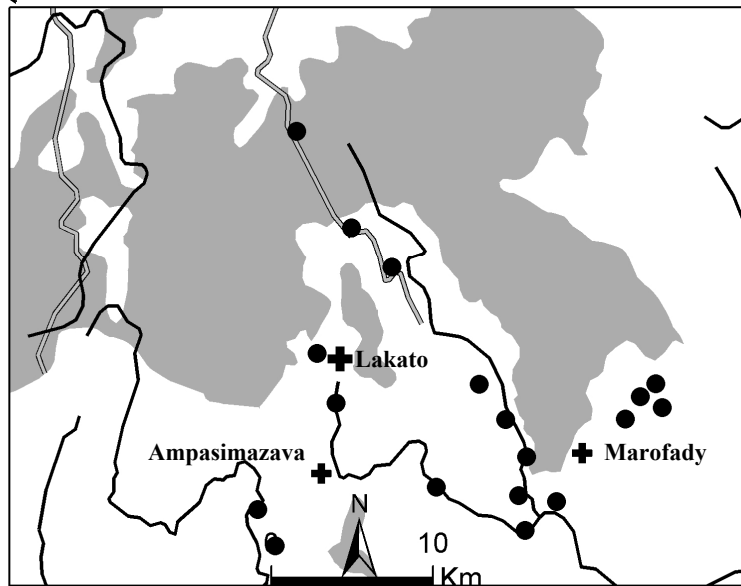

Supplement: MOESM2 [file 9547320]
